# Supplementary material
Source: publisher site journal article supplement (https://biss.pensoft.net/article/download/suppl/7370652/)

# Goals and Ambitions of the BiCIKL project

Lyubomir Penev & the  
BiCIKL Consortium

**BiCIKL Kick-off Meeting**  
**27 May 2021**

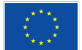

This project receives funding from the European Union's Horizon 2020 research and innovation programme under grant agreement No 101007492

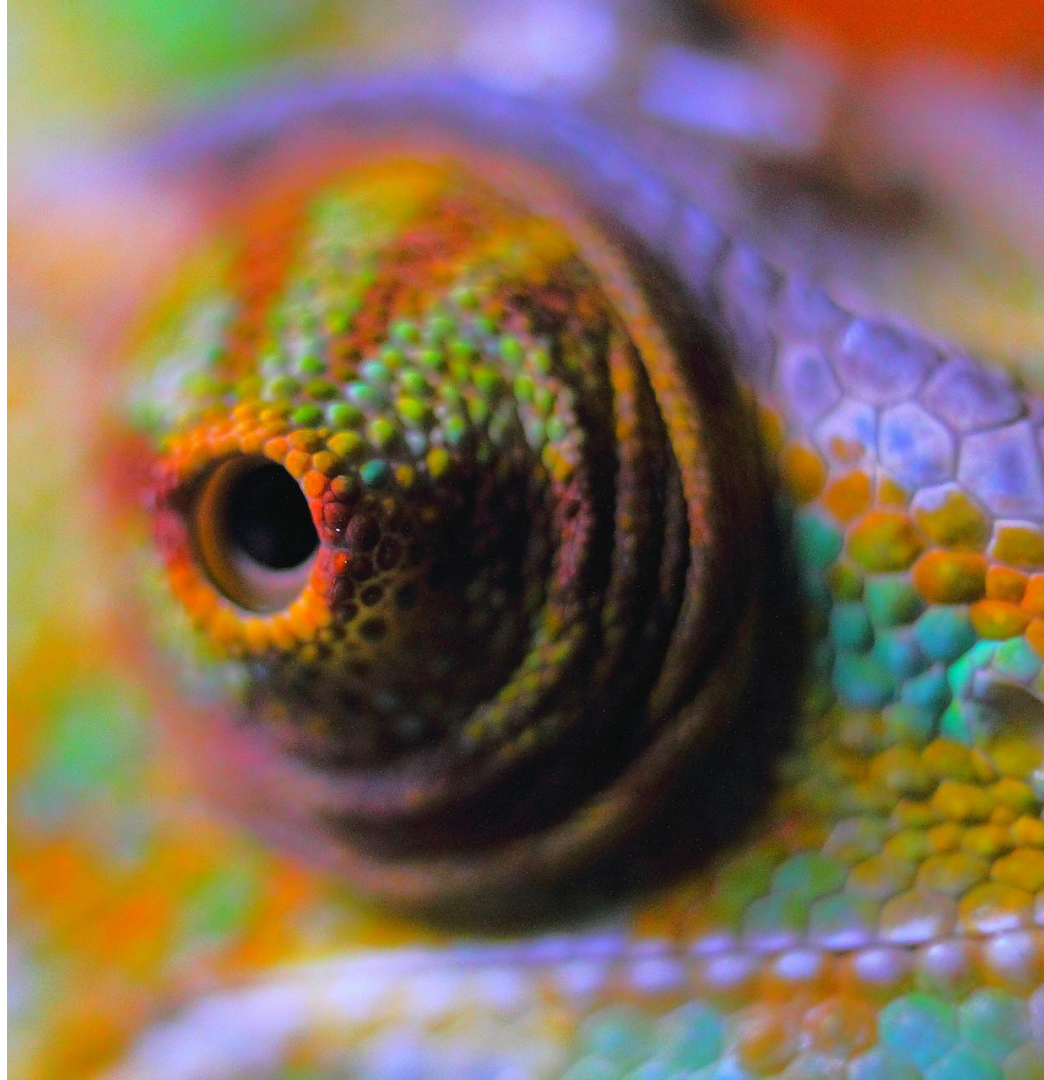

# ••••• The three main realms of biodiversity data

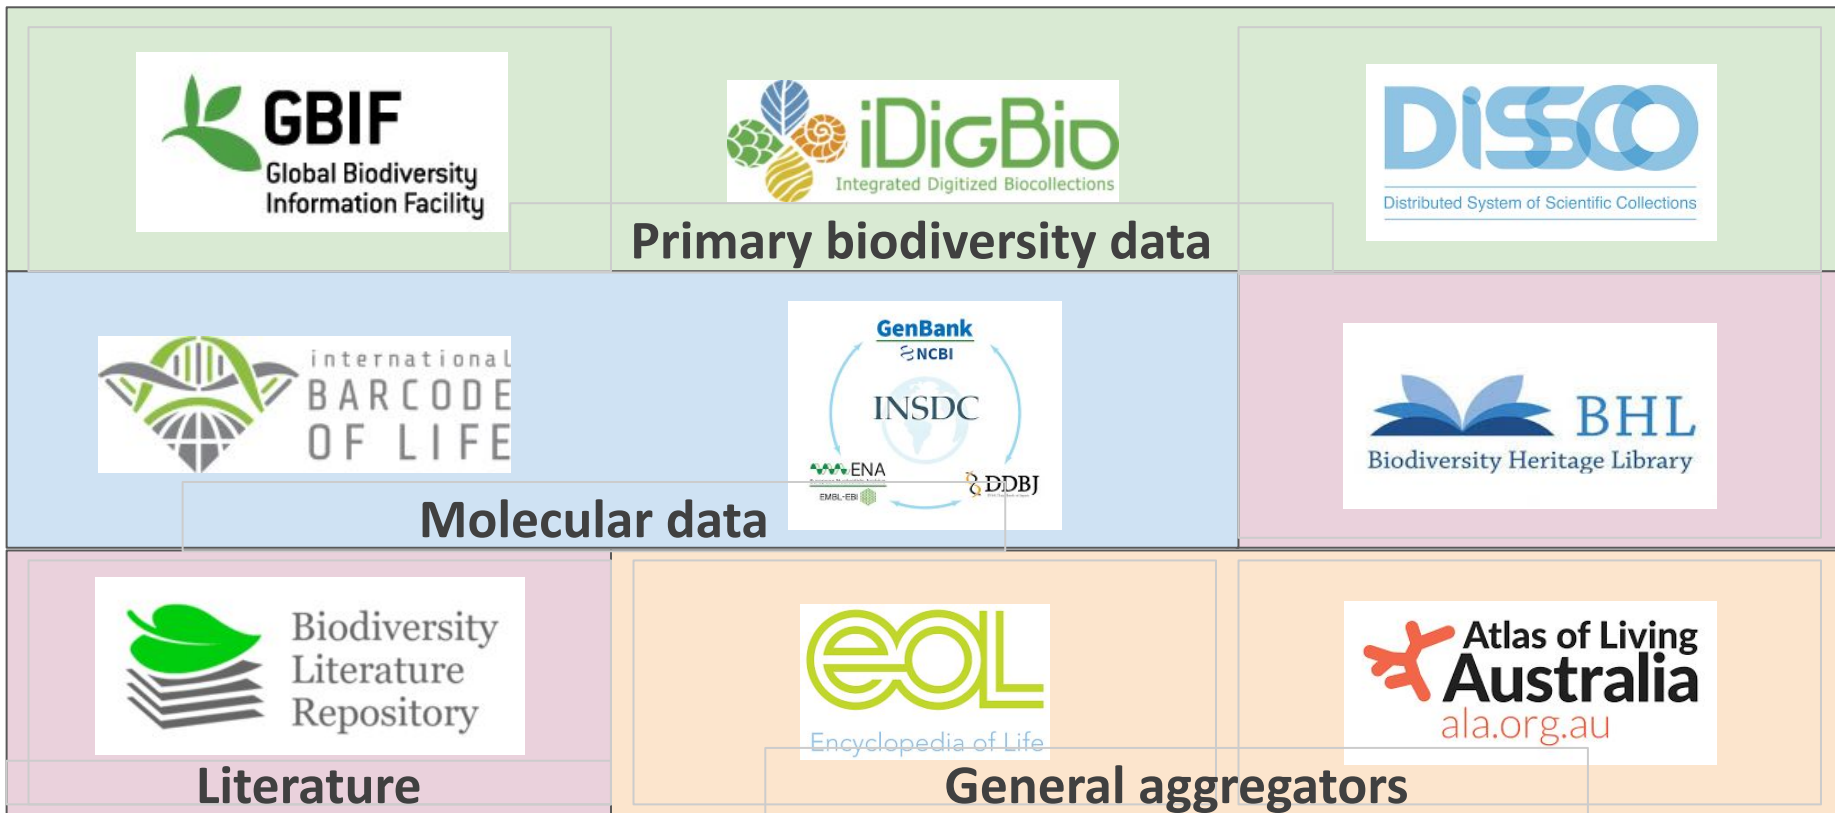

# •••• The challenges

- Imbalances in **regional engagement** in biodiversity informatics.
- Uneven progress in **data mobilization and sharing**.
- Insufficient use of uniform **persistent identifiers** for data.
- Redundant and incompatible processes for **cleaning and interpreting data**.
- The absence of functional mechanisms for experts to **curate and improve data**.
- **Linking between the biodiversity data infrastructures is still in infancy.**

# BiCIKL brief profile

- Biodiversity Community Integrated Knowledge Library
- Work programme: Integrating Activities for Starting Communities (INFRAIA-02-20203)
- Duration: 3 years (1 May 2021-30 April 2024)

public sector private sector  
**cross-disciplinary**  
**14 participants**

International & European research infrastructures

**10 countries**

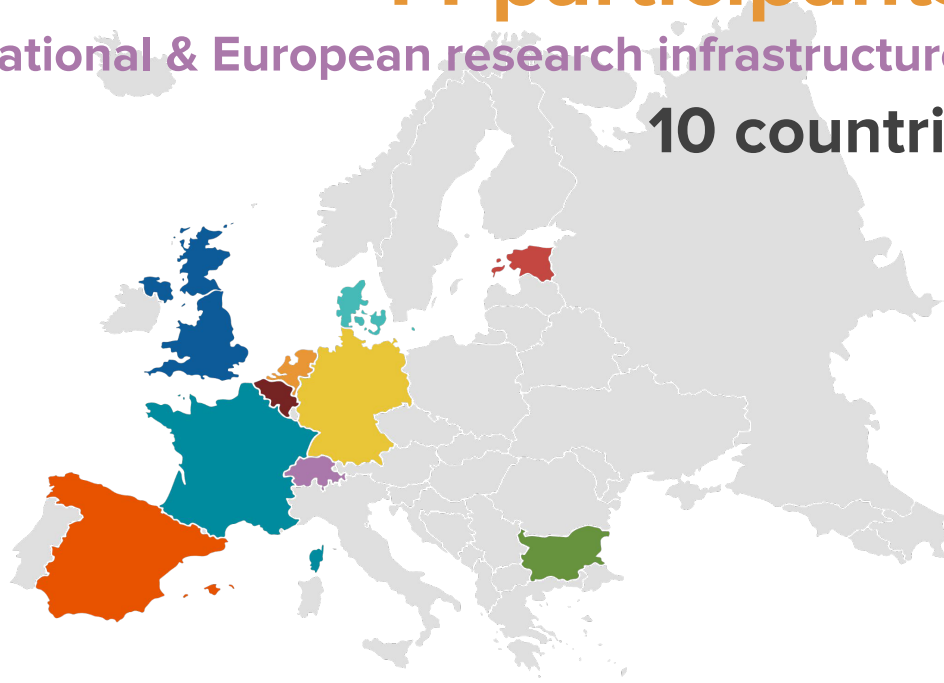

# ••••• The BiCIKL partners

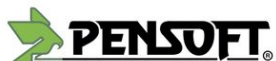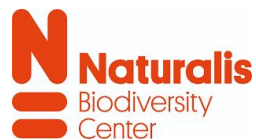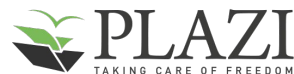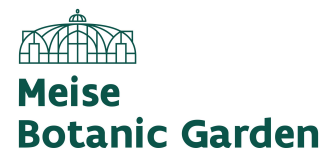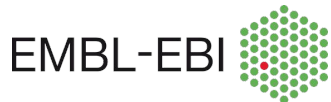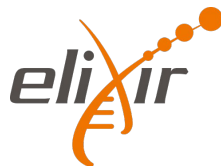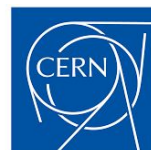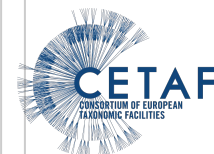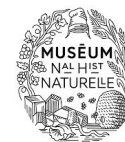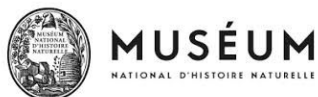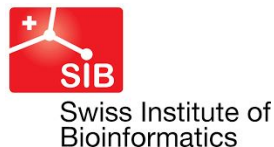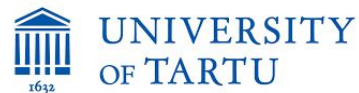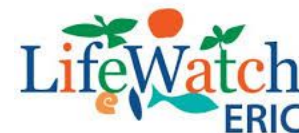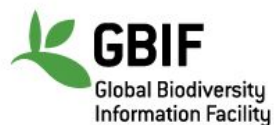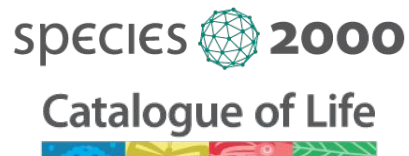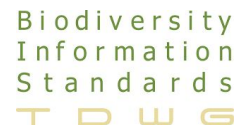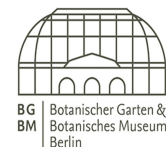

# BiCIKL Research Infrastructures



ARPHA XML



OpenBiodiv



DiSSCo

Distributed System of Scientific Collections



LifeWatch eInfra



Biodiversity and Ecosystem VREs



PlutoF



Zenodo



SIBiLS

SWISS INSTITUTE OF BIOINFORMATICS  
LITERATURE SERVICES



TreatmentBank



BLR

Biodiversity Literature Repository



Catalogue of Life



GBIF

Global Biodiversity Information Facility



European Nucleotide Archive

ENA



Meise Botanic Garden

MeiseBG



BG  
BM

Botanischer Garten &  
Botanisches Museum  
Berlin



BG  
BM

Botanischer Garten &  
Botanisches Museum  
Berlin

FUB-BGBM



Europe PubMed Central



# Rationale

- Biodiversity **data deluge**:
  - > 500 million pages of published literature
  - > 2 billion specimens in collections
  - > 1.8 million species described
  - many billions of gene sequences
- How do we transform **raw data** and such from published narratives into **actionable knowledge**?
- How do we **link digital objects together**?
- Where and how do we **store, annotate, manage and use links** between data?

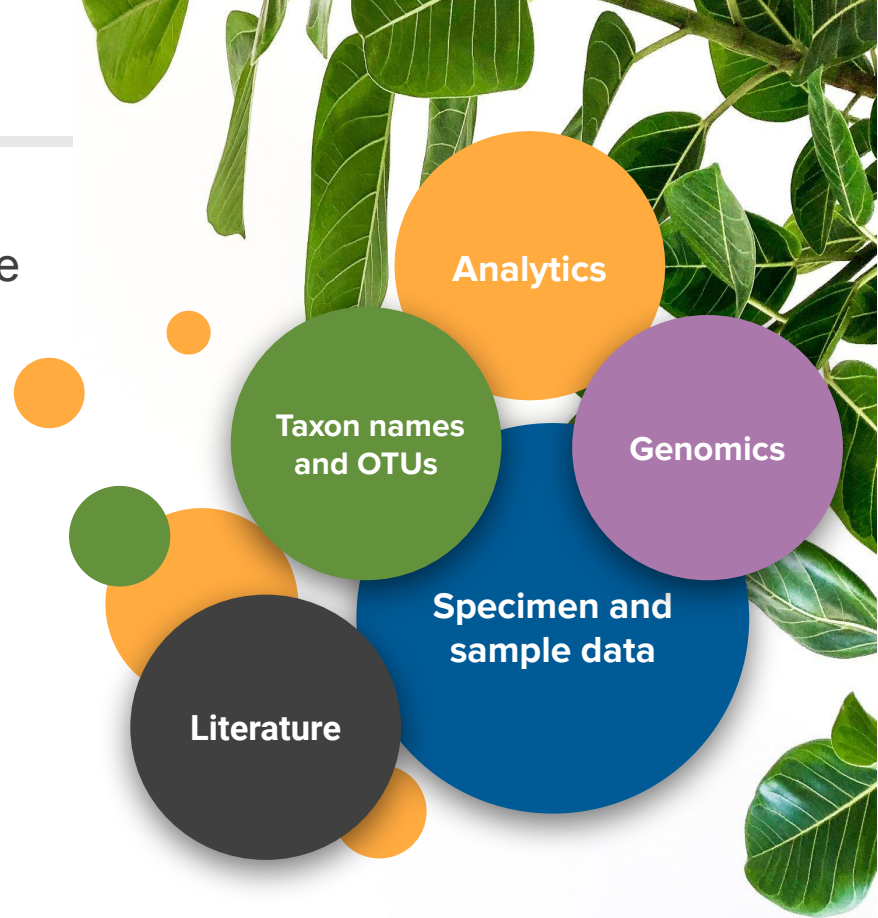



# Mission

- ACCESS** to data, associated tools and services at each stage & along the entire research cycle.
- LINKS** between:
  - specimens → genetic sequences → species → analytics → publications → biodiversity knowledge graph → re-use.

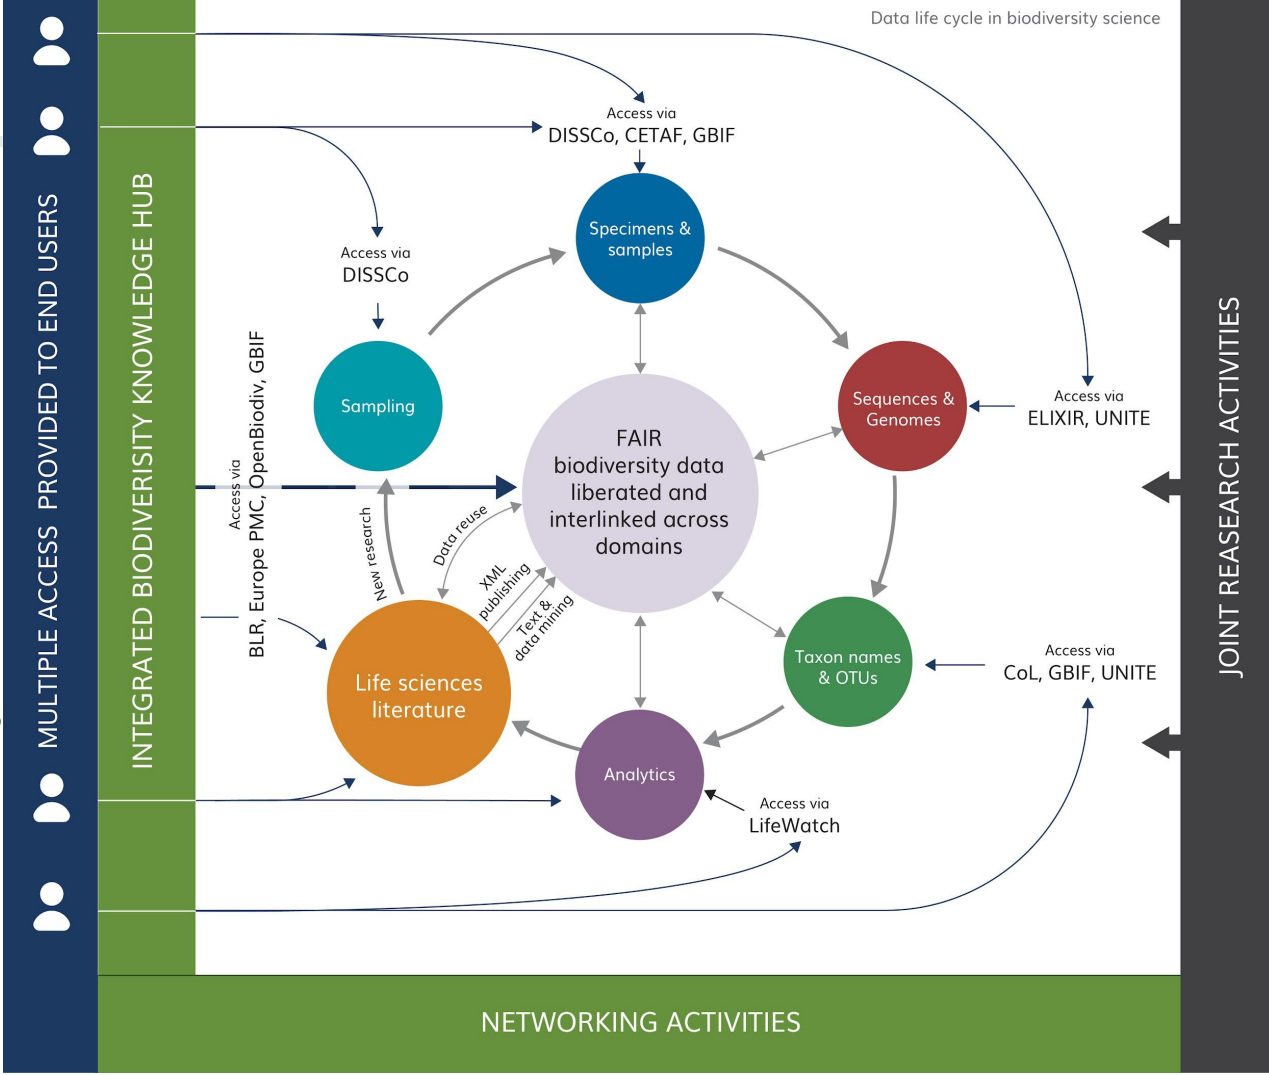

# Special focus on literature

3. **Methods, tools** and **workflows** for **harvesting, liberating, linking, and re-using of sub-article-level data, extracted from literature.**

Data from both **legacy** (PDF-based) literature and **prospective** (XML-based) publishing come together.

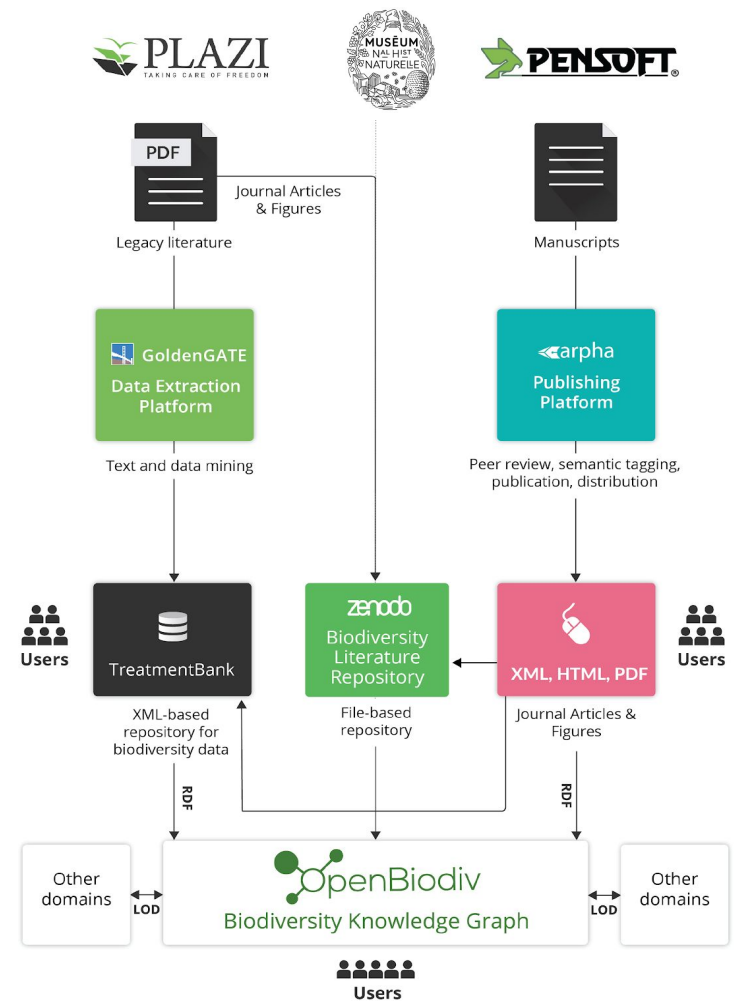

# Specific objectives

- 1 Develop and implement **open science** research practices
- 2 Harmonise **policies, standards and technologies** between the participating key infrastructures
- 3 Engage all actors and other stakeholders in the process of data upload/ingestion and **FAIR data delivery**
- 4 Improve **researchers' capacity** through enhanced digital skills in linking open data

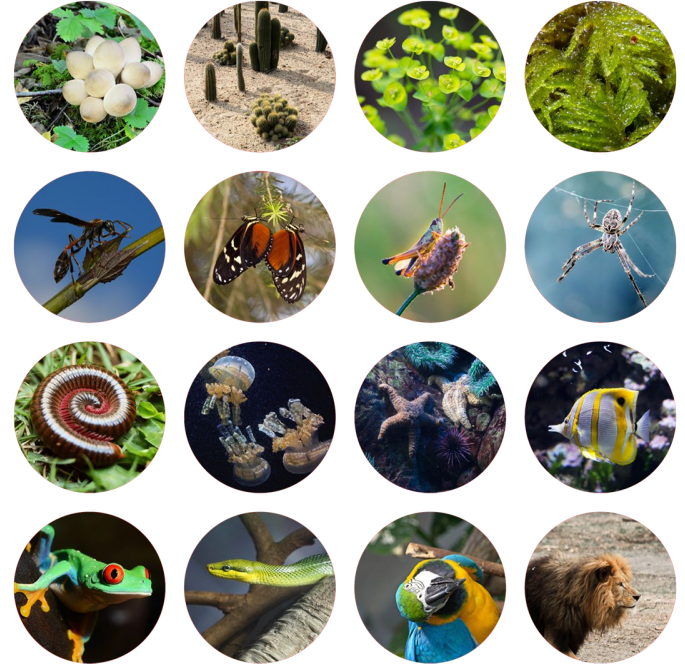

# Specific objectives

5

Provide a **one-stop access point** to guidelines, standards, data and services via the newly developed Biodiversity Knowledge Hub (BKH)

6

Foster **joint research agendas** of European and international researchers

7

Support industrial innovation in building and implementation of next-generation, standards-aligned and **semantics-based publishing workflows**

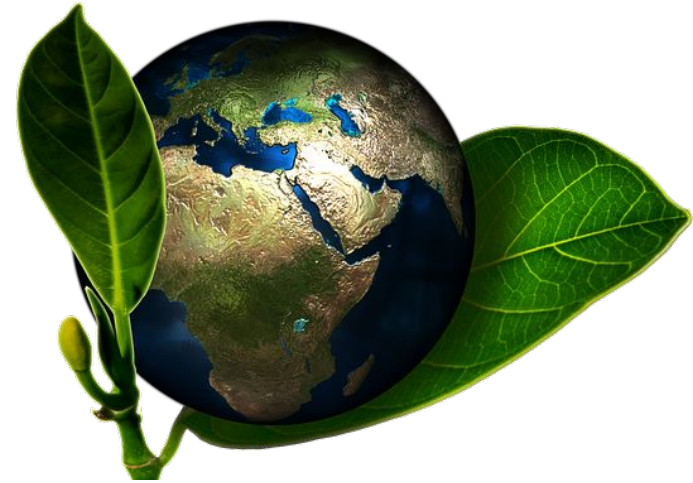

# Specific objectives

8

**Liberate** and re-use the vast knowledge and **data imprisoned in literature.**

9

Support researchers' **access to the Linked Open Data** world through interoperable, AI-based, **FAIR Data Place (FDP)** interface, discovering & validating links between different resources.

10

Facilitate interdisciplinary research and **generation of new knowledge** through linking of FAIR data from different resources and domains

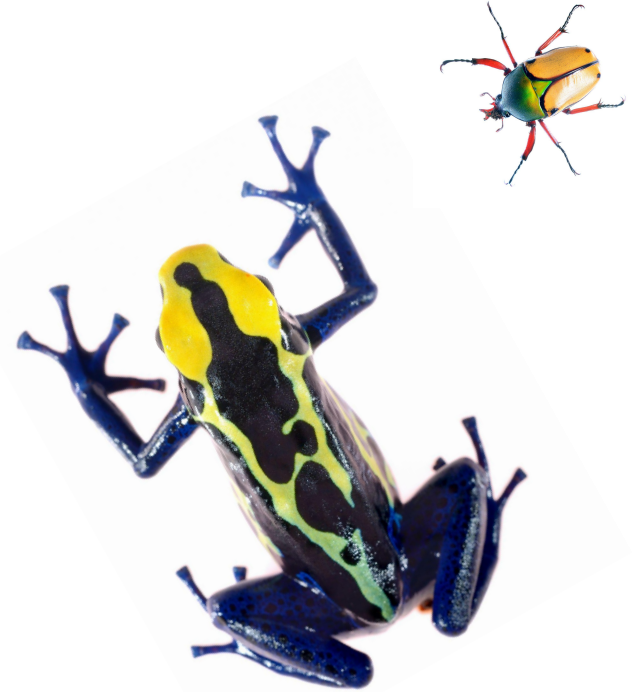

# ••••• The BiCIKL key products

1

A vibrant community equipped with tools for search of & access to **FAIR interlinked data**

2

Interlinked **corpora of knowledge**, used by biodiversity & related research domains

3

Automated tools & workflows for **data liberation & FAIR-isation** from literature

4

Semantic-based journal production workflows for **publication and re-use of FAIR biodiversity data**

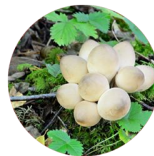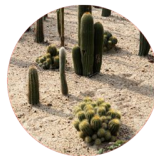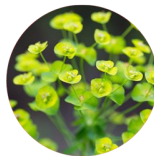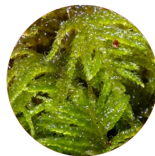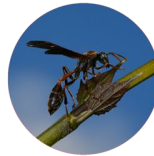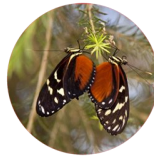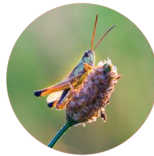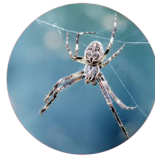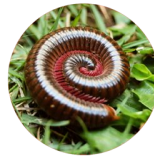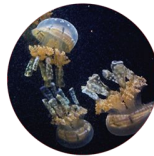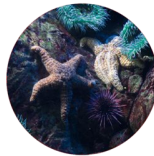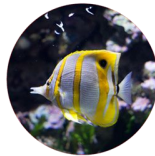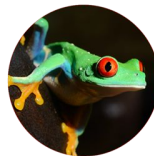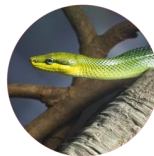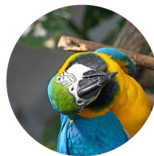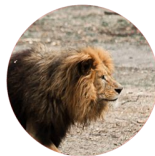

# ••••• The BiCIKL Pillars

Holistic targeted assembly of interlinked, machine-readable  
FAIR biodiversity data

Networking  
Activities

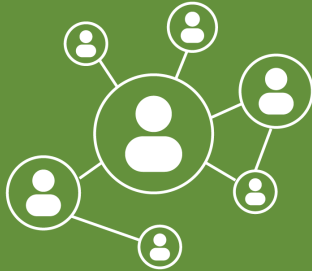

Trans-national and  
Virtual Access

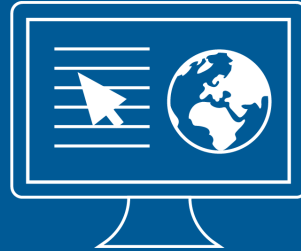

Joint Research  
Activities

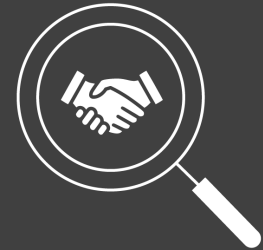

# The BiCIKL Work packages

| Networking Activities (NA) Pillar                                                                                                | Trans-national and Virtual Access (TA+VA) Pillar                        | Joint Research Activities (JRA) Pillar                                                                   |
|----------------------------------------------------------------------------------------------------------------------------------|-------------------------------------------------------------------------|----------------------------------------------------------------------------------------------------------|
| <b>WP1</b>                                                                                                                       | <b>WP4</b>                                                              | <b>WP6</b>                                                                                               |
| NA-01 Coordination and interoperability of infrastructures through harmonisation of community policies, standards and guidelines | TA-01 Trans-national access to biodiversity infrastructure and services | JRA-01 Liberation of data from literature, next-generation semantic publishing and delivery of FAIR data |
| <b>WP2</b>                                                                                                                       | <b>WP5</b>                                                              | <b>WP7</b>                                                                                               |
| NA-02 Defining & co-designing the Biodiversity Knowledge Hub (BKH) and operational training                                      | VA-01 Virtual access to biodiversity infrastructure and services        | JRA-02 Providing core access services and FAIR data on specimens and samples                             |
| <b>WP3</b>                                                                                                                       |                                                                         | <b>WP8</b>                                                                                               |
| NA-03 Implementation, stakeholder engagement and outreach for the Biodiversity Knowledge Hub                                     |                                                                         | JRA-03 A data foundation for connected molecular, natural history collections and taxonomic data         |
|                                                                                                                                  |                                                                         | <b>WP9</b>                                                                                               |
|                                                                                                                                  |                                                                         | JRA-04 Delivering a trusted and evolving taxonomic framework for data integration                        |
|                                                                                                                                  |                                                                         | <b>WP10</b>                                                                                              |
|                                                                                                                                  |                                                                         | JRA-05 FAIR Data Place: linking, finding and access                                                      |
| <b>WP11 Project management</b>                                                                                                   |                                                                         |                                                                                                          |



# Networking (NA): 24.7 % of the budget

- 1 Standards & harmonisation of FAIR data linking between RIs
- 2 Training and capacity building
- 3 Communication, dissemination and outreach
- 4 Concept design of the Biodiversity Knowledge Hub (BKH)
- 5 Building and promotion of the BKH

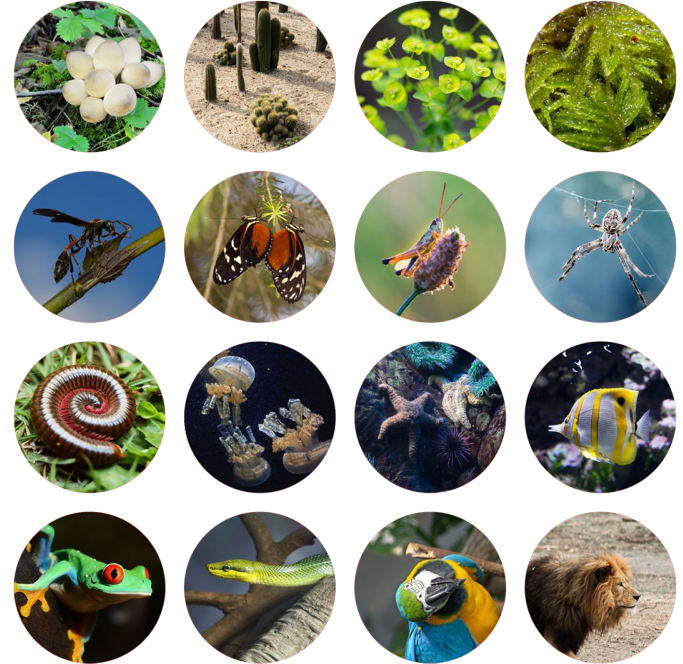

# Trans-national and Virtual (TA/VA) access: 20.5% of the budget!



ARPHA XML



OpenBiodiv



DiSSCo



LifeWatch eInfra



Biodiversity and Ecosystem VREs



PlutoF



Zenodo



SIBiLS



SWISS INSTITUTE OF BIOINFORMATICS  
LITERATURE SERVICES



TreatmentBank



BLR



Catalogue of Life



GBIF



European Nucleotide Archive



ENA



Meise Botanic Garden



MBG



BG  
BM



BG  
BM

FUB-BGBM

# Horizontal linkages between research infrastructures

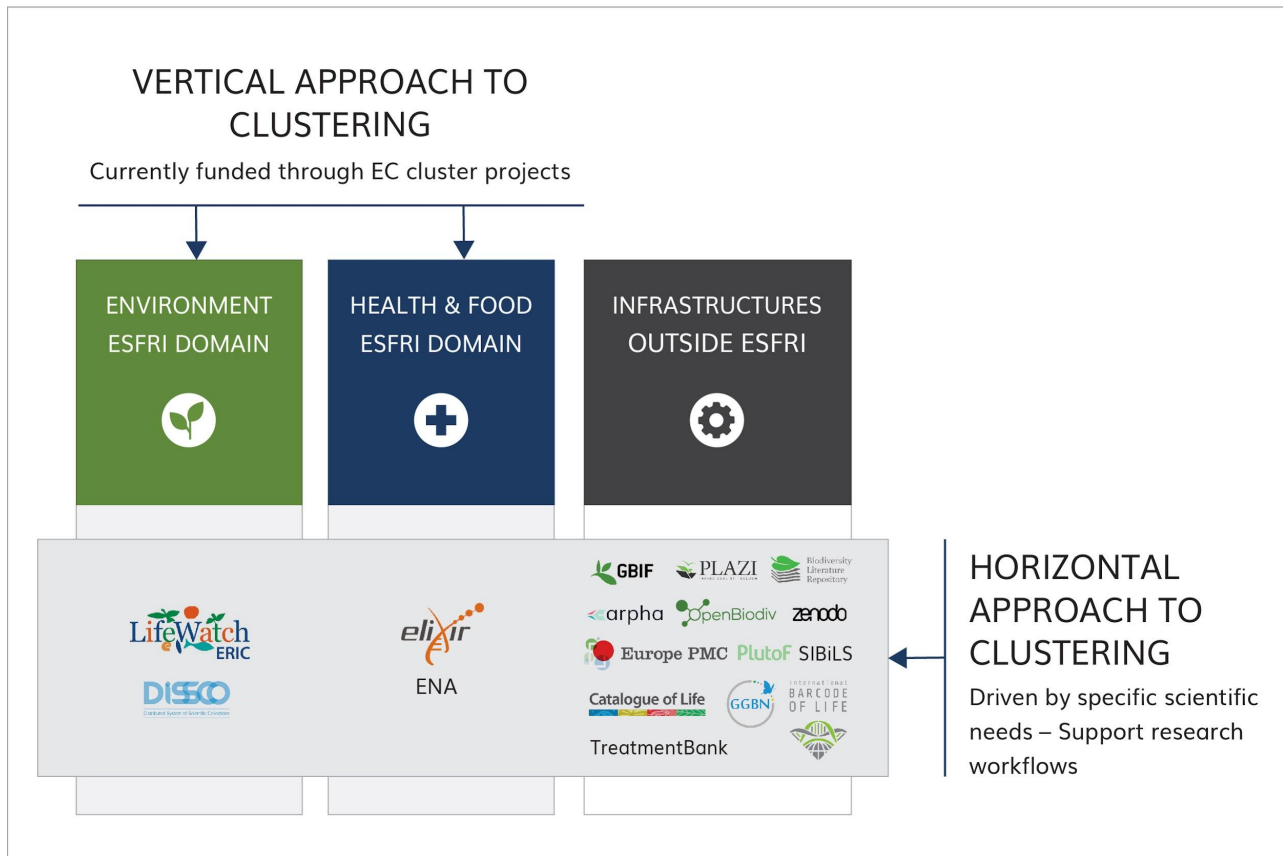

# Joint Research Activities (JRA): 43.3 % of the budget

- 1 Open APIs at each RI following community accepting standards
- 2 New tools and services at each participating RI **towards data linking with others**
- 3 Testing of access to linked data through TA/VA
- 4 Fair Data Place for search, access and storage of links between data

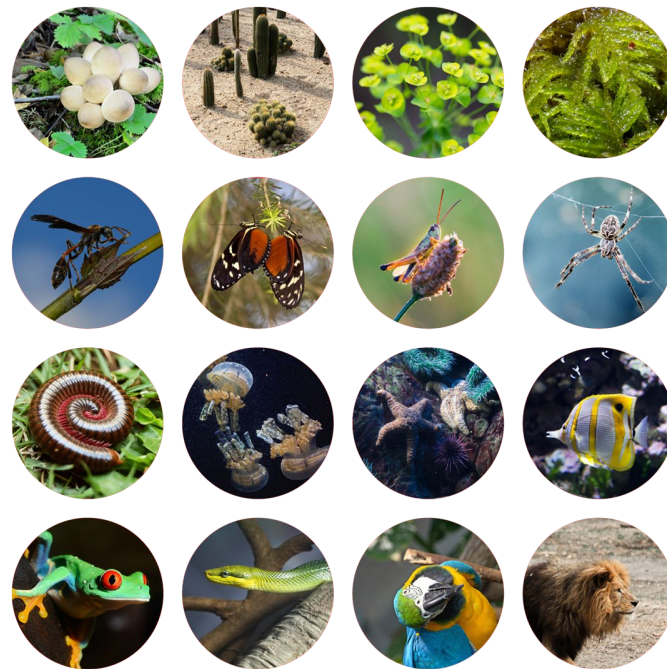

# ••••• The BiCIKL key question: What is ‘data linking’?

- **Linking between individual data records**
  - Through text string matches
  - Through persistent unique identifiers (PIDs)
  - Mostly uni- or bi-directional
  - Linking through literature (citations *sensu lato*)
- **Linked Open Data in the cloud**
  - Always through stable HTTP identifiers (URI)
  - Fully interoperable (RDF triples and other)
  - Machine-actionable
  - Multi-directional, anyone to anyone
- **High-level linking between two and/or many Research Infrastructures**

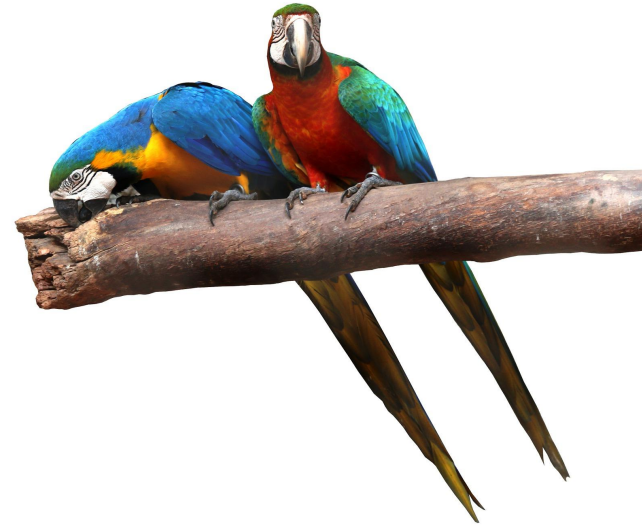

# Why linking data

## A simple answer (among many others):

Due to the enormous data deluge, especially in (meta)genomics, and the disruptive changes towards a digital world, it is not sufficient for even a renown taxonomist to say: “This is Species X”

Rather, the reasonable statement would be: This is Species X, according to Treatment X, Specimen(s) XYZ and Sequence X, with a direct access to the data.

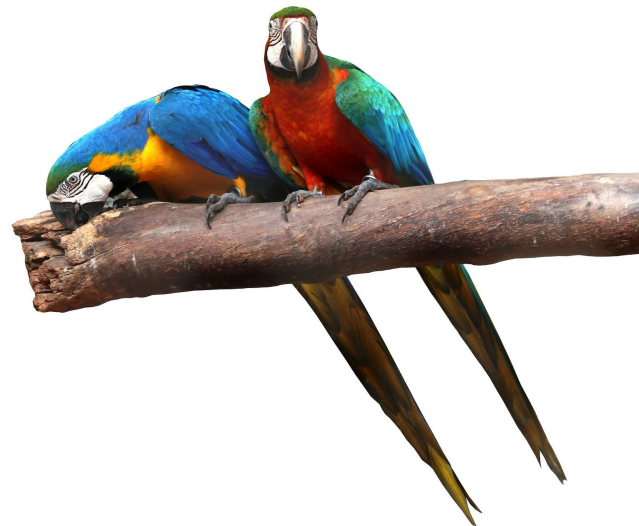

# ••••• Technological approaches to data linking

Linking can be performed through / between:

- Relational databases & Data warehousing
- Fair Data Objects (Open Digital Specimens)
- Linked Open Data (e.g. between RDF triples)
- Nanopublications
- Other?

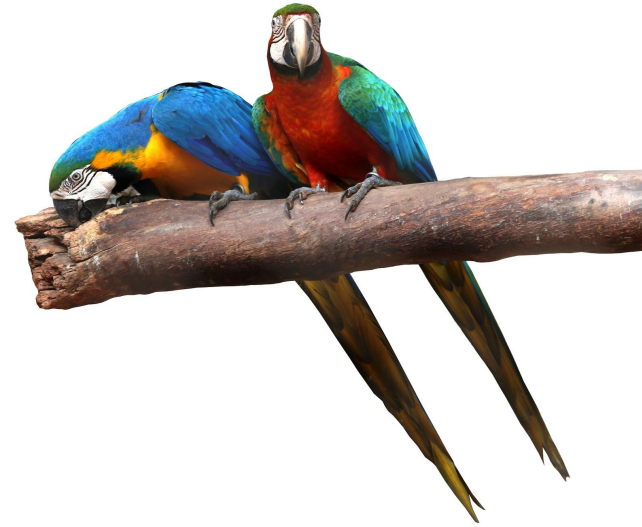

# Where and how to link biodiversity data? Where and how to store and use these links?

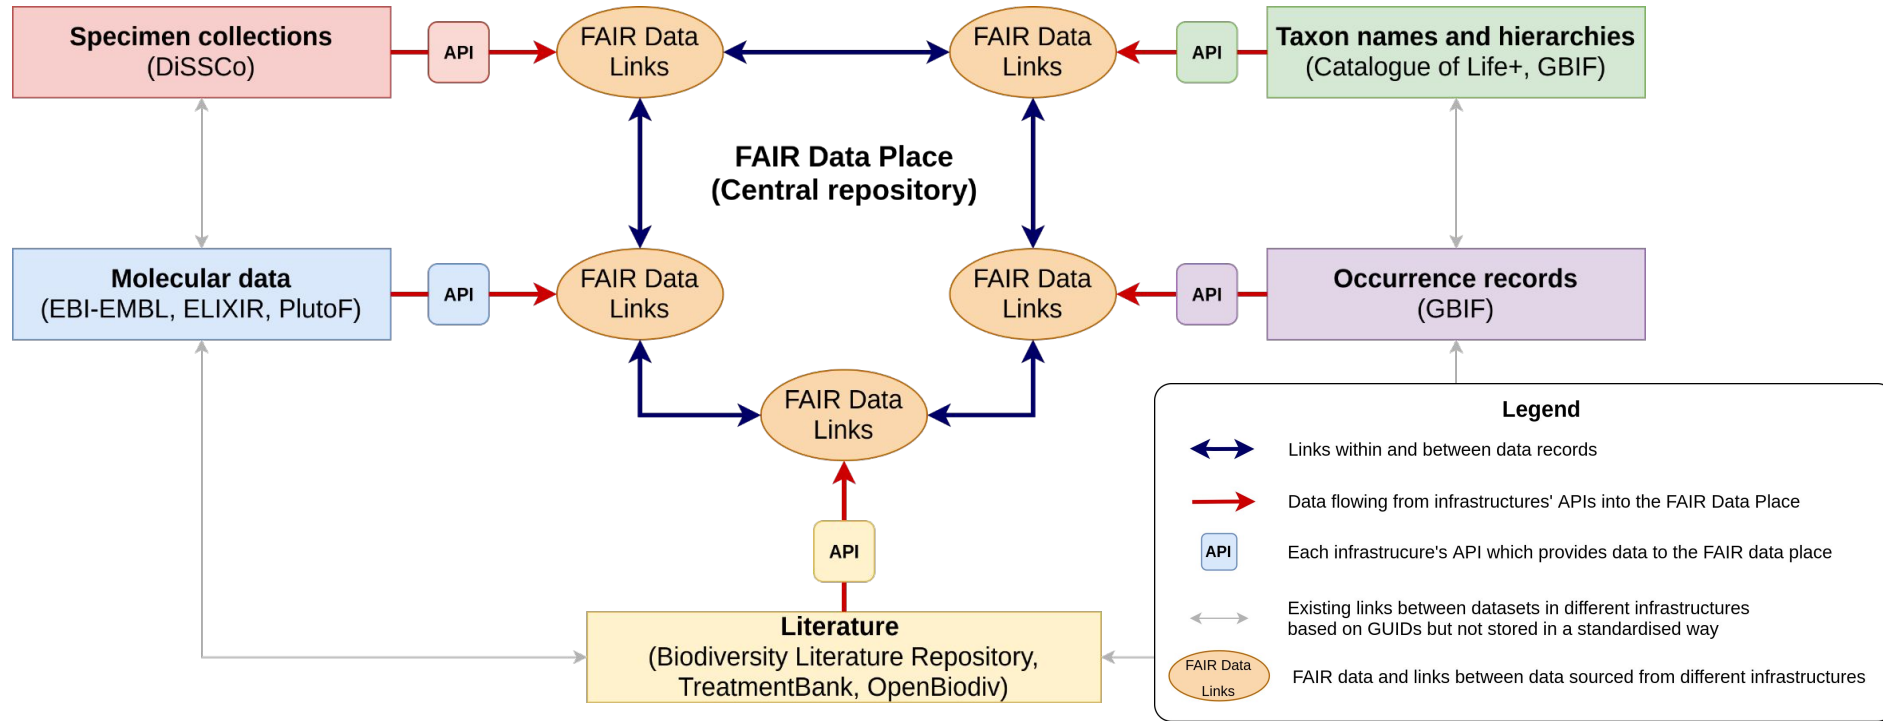



# Thank you for your attention and Good Luck, BiCIKL!

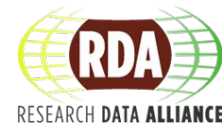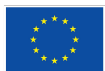

This project receives funding from the European Union's Horizon 2020 research and innovation programme under grant agreement No 101007492

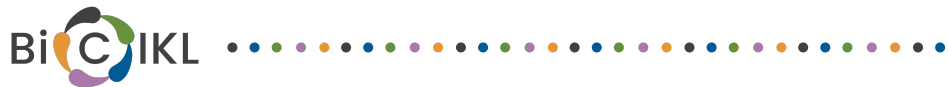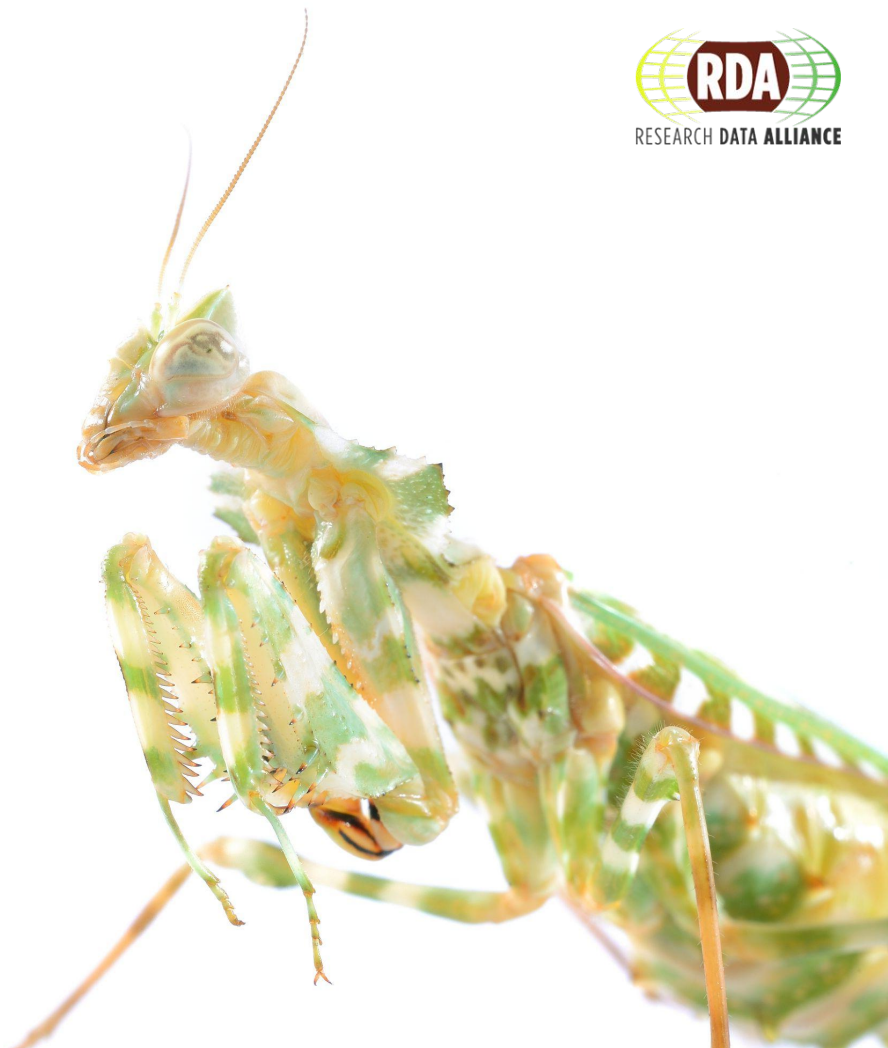

Supplement: Supplementary file 1
